# Supplementary material
Source: Research Square preprint supplement (doi:10.21203/rs.3.rs-9139956/v1)
Supplement: Supplementary file 1 [file c377f8c3d7b4e8af2e7babd3.docx]

**Supplementary Material**


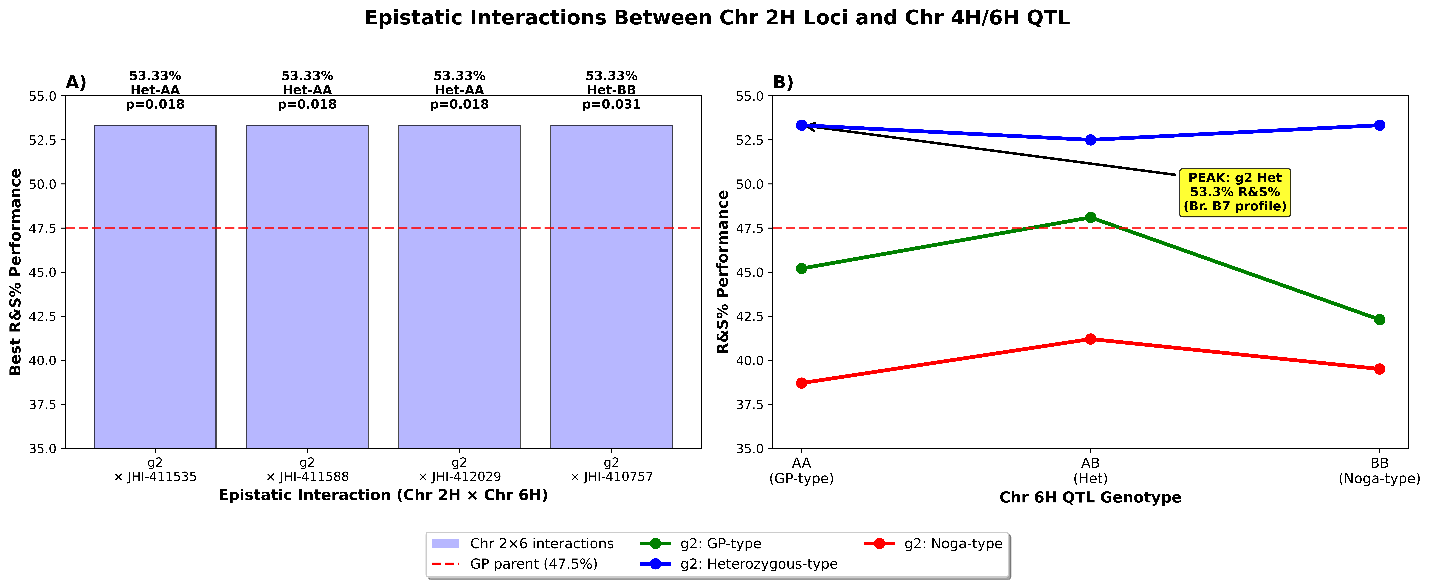


***Supplementary Figure 1.*** *Epistatic interactions between chromosome 2H markers and chromosome 4H/6H QTL markers. (A) Top four significant interactions showing g2 heterozygous advantage, achieving 53.3% R&S performance. (B) g2 heterozygous genotypes consistently outperform homozygous genotypes across chromosome 6H backgrounds.GP parent performance (47.5%) dashed line. Colors indicate g2 genotypes: green=GP-type (AA), blue=heterozygous (AB), red=Noga-type (BB).*


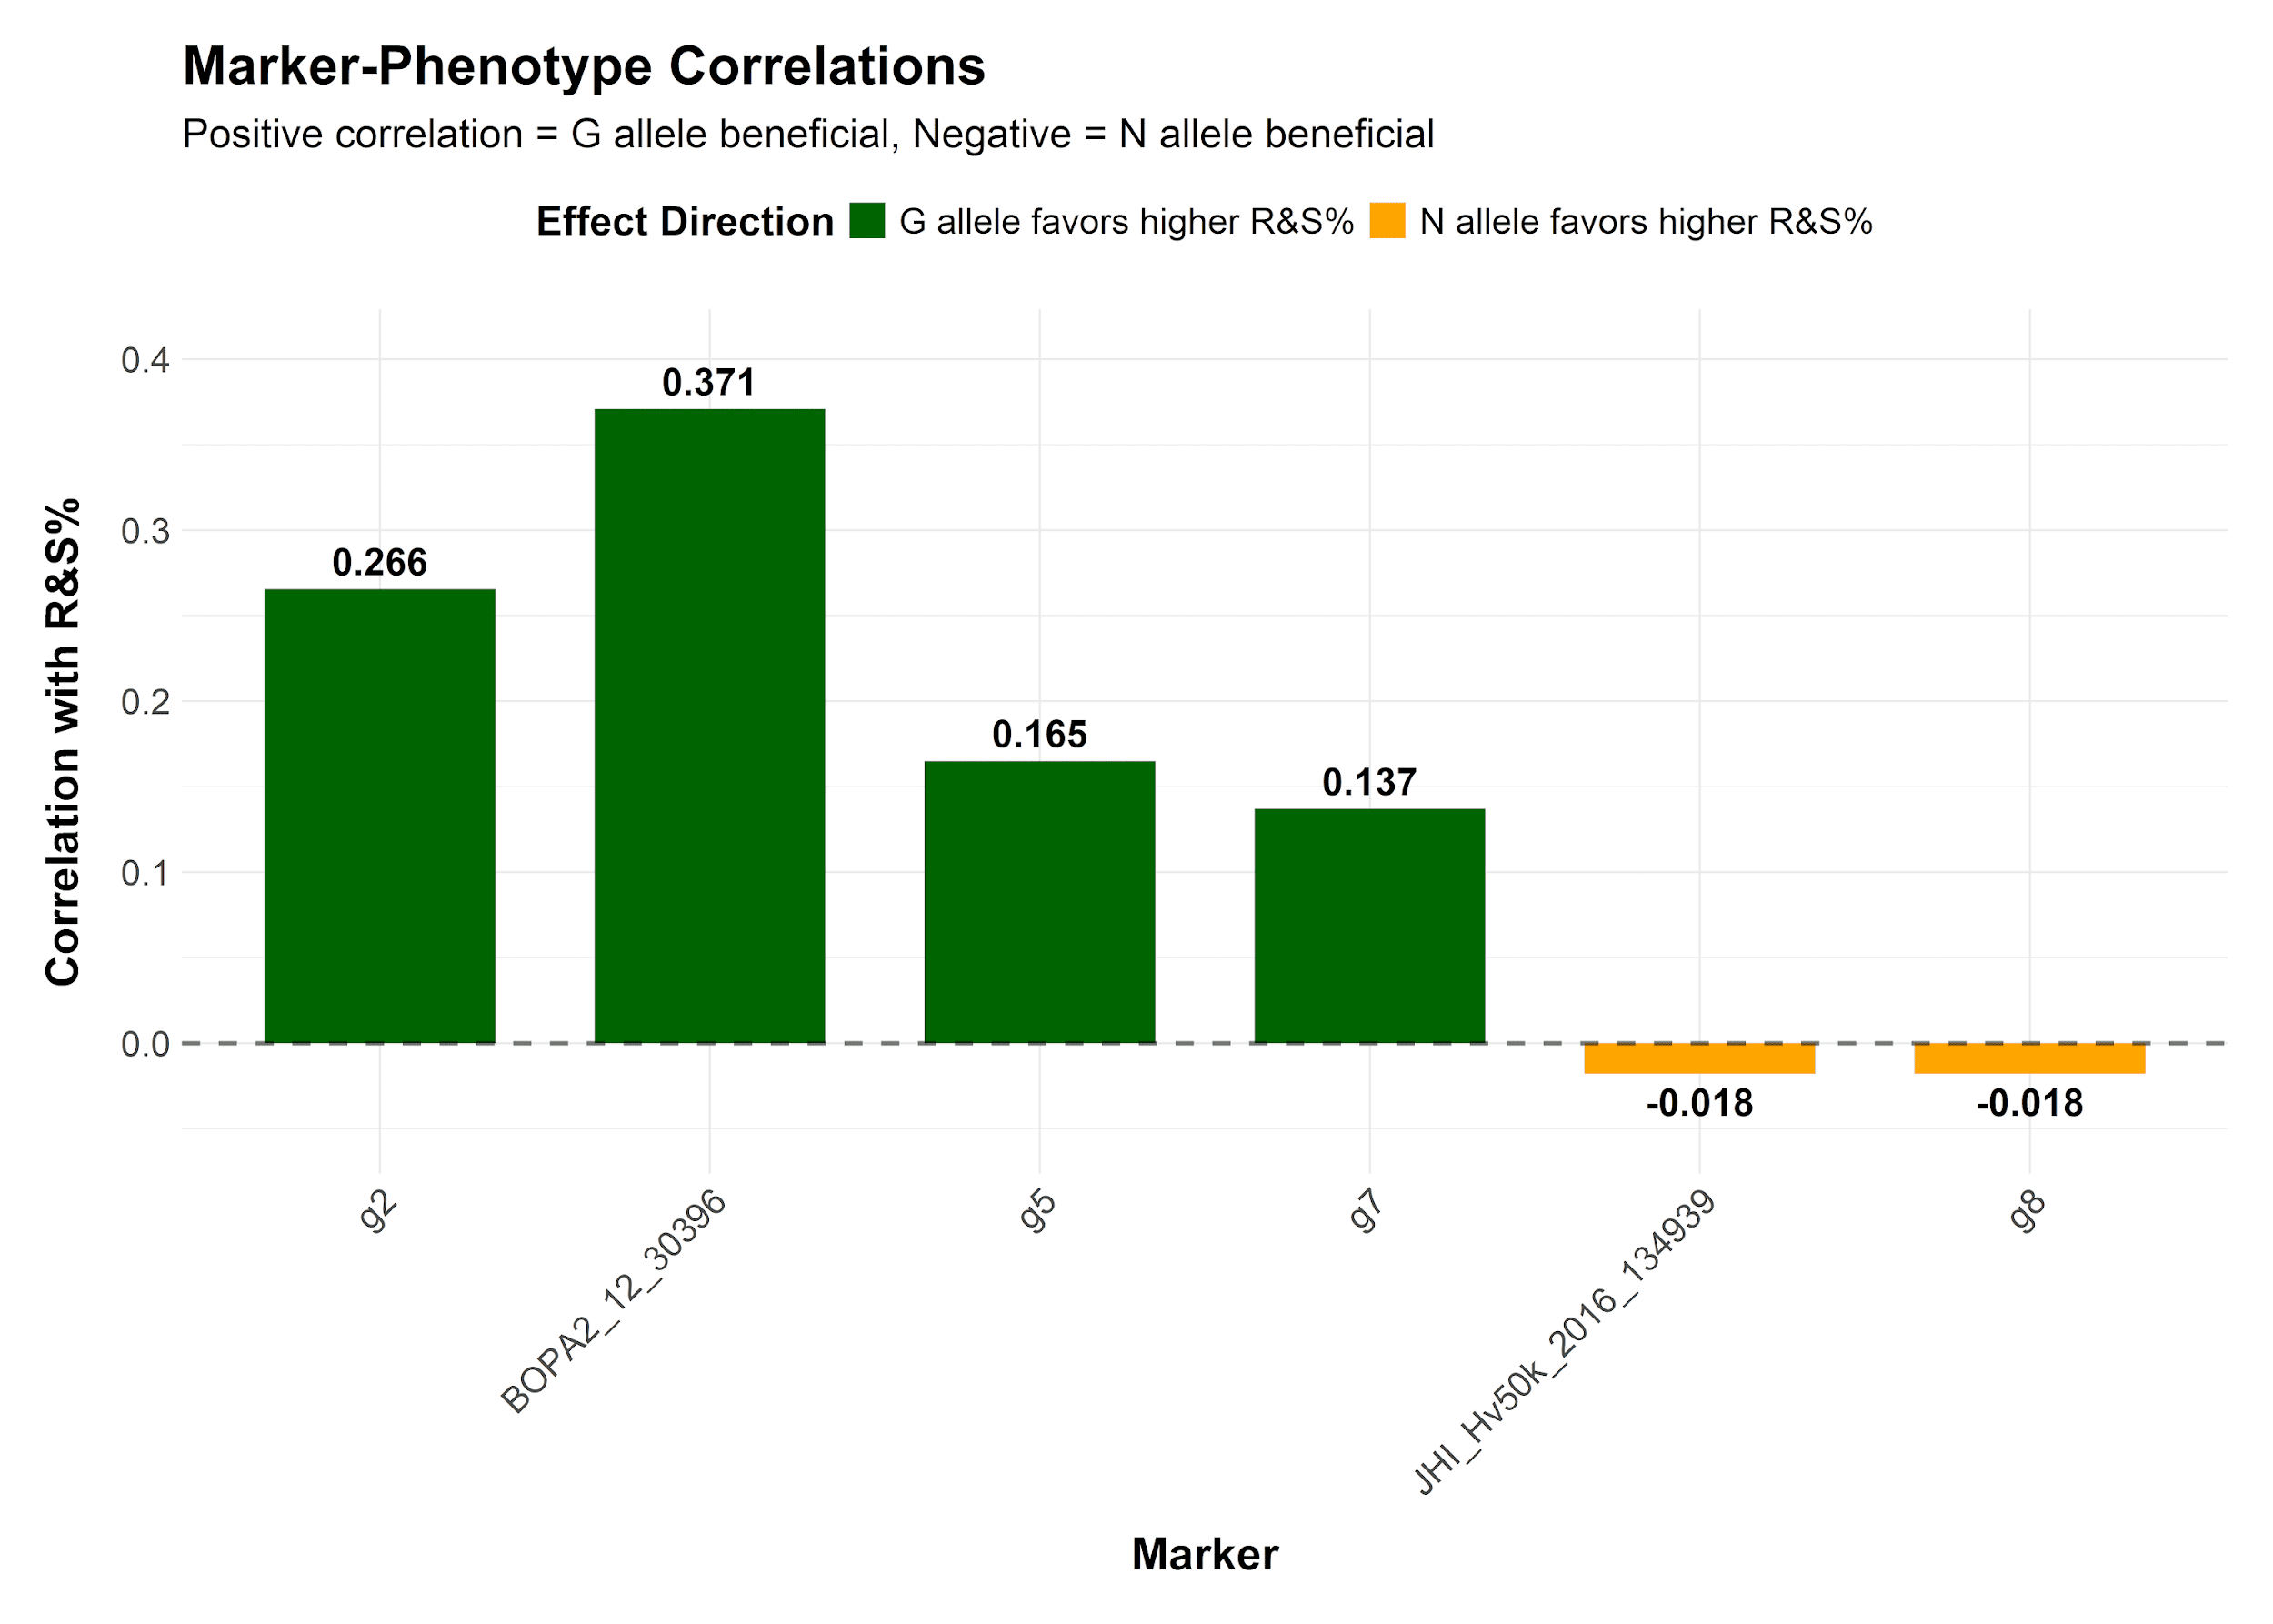


***Supplementary Figure 2.*** *Marker-phenotype correlations for R&S% trait across 22 lines. Green bars indicate GP alleles favour higher R&S%, orange bars indicate Noga alleles are beneficial. BOPA2_12_30396 shows the strongest positive correlation (r = 0.371).*

***Supplementary Table 1.*** *List of markers used for genotyping.*

| **Marker** | **Primer 5'-3'** | **ID** | **Position (Morexv3)** | **Amplicon Size (bp)** | **Digestion Enzyme/Difference Type** | **Digested/Differece Genotype** | **Expected Digestion Sizes (bp)** |
| --- | --- | --- | --- | --- | --- | --- | --- |
| g2 | TGCAATCCGCATGGCGATCT | 13E1 | 2H:626786360-626786379 | 836 | Deletion | Deletion in Noga | Noga: 724 |
| GTGGGTTAGTGGAGCTTGGA | 13E2 | 2H:626787176-626787195 |
| BOPA2-12-30396 | CACCCGTGTCAACCCTAACT | 11E6 | 2H:634401113-634401132 | 729 | AclI | GP | 385 & 344 |
| TGTGGTCCATGAGAGTCCAA | 11E7 | 2H:634401822-634401841 |
| g5 | GAGCGATAGTTTTAGAGAAAATCA | 13E5 | 2H:637960812-637960835 | 697 | SNPs | Pos. 637960863 -> C in GP/ G in Noga ||| Pos. 637961227 -> T in GP/ C in Noga | 697 |
| ACTCGGCCATATCTTGTTTG | 13E6 | 2H:637961489-637961508 |
| g7 | GAGAACGATCAAGAGCCTTA | 12B6 | 2H:642586495-642586514 | 2281 | Deletion | Deletion in Noga | Gene (g7) not found in Noga |
| CACGTACGGCCCACTCATTT | 12B5 | 2H:642588756-642588775 |
| JHI-Hv50k-2016-134939 | CTGAACCGGCCACGGATCAT | 6C3 | 2H:643181060-643181079 | 965 | NdeI | GP | 760 & 205 |
| GACAGTACCTCGCTCTTGAG | 6C4 | 2H:643182005-643182024 |
| g8 | CCCTACAATTGCACTAGCAT | 13E3 | 2H:643193401-643193420 | 742 | Deletion | Deletion in GP | GP: 502 |
| CCAGATAGATCGTGCTCACT | 13E4 | 2H:643194123-643194142 |

***Supplementary Table 2.*** *Top epistatic interactions between chromosome 2H and chromosome 4H/6H QTL markers. All significant interactions involve g2 marker with chromosome 6H QTL, showing heterozygous advantage exceeding GP parent performance (47.5%). AA = GP-type homozygous; BB = Noga-type homozygous; AB = heterozygous.*

| **Rank** | **Chr 2H Marker** | **Modifier QTL Marker** | **Modifier Chr** | **Optimal Genotypes** | **R&S% Performance** | **P-value** | **F-statistic** | **Sample Size** |
| --- | --- | --- | --- | --- | --- | --- | --- | --- |
| 1 | g2 | JHI-Hv50k-2016-411535 | Chr 6H | AB-AA | 53.33 | 0.017925443 | 6.18 | 17 |
| 2 | g2 | JHI-Hv50k-2016-411588 | Chr 6H | AB-AA | 53.33 | 0.017925443 | 6.18 | 17 |
| 3 | g2 | JHI-Hv50k-2016-412029 | Chr 6H | AB-AA | 53.33 | 0.017925443 | 6.18 | 17 |
| 4 | g2 | JHI-Hv50k-2016-410757 | Chr 6H | AB-BB | 53.33 | 0.030830392 | 5.25 | 14 |
| 5 | g2 | BOPA1_ConsensusGBS0241-3 | Chr 6H | AB-BB | 53.33 | 0.030830392 | 5.25 | 14 |
| 6 | g2 | JHI-Hv50k-2016-411613 | Chr 6H | AB-BB | 53.33 | 0.033106013 | 4.35 | 17 |
| 7 | g2 | JHI-Hv50k-2016-411509 | Chr 6H | AB-BB | 53.33 | 0.033106013 | 4.35 | 17 |
| 8 | g2 | BOPA1_5187-752 | Chr 6H | AB-BB | 53.33 | 0.033106013 | 4.35 | 17 |
| 9 | g2 | JHI-Hv50k-2016-411580 | Chr 6H | AB-BB | 53.33 | 0.033106013 | 4.35 | 17 |
| 10 | g2 | BOPA2_12_10393 | Chr 6H | AB-BB | 53.33 | 0.033106013 | 4.35 | 17 |
